# Supplementary material
Source: publisher site journal article supplement (https://www.dovepress.com/article/257645)
Supplement: Supplementary file 1 [file get_supplementary_file.php]

SUPPLEMENTARY INFORMATION

Materials and methods

# Materials preparation

The raw detonation nanodiamonds (NDs) were obtained by HeYuan ZhongLian Nanotechnology Co. Ltd (<10 nm), 3 mg raw detonation NDs are put into 10 mL bottle with absolute alcohol (Guangzhou chemical reagent) to form the suspension. After explosive detonation followed by acid washing, the raw NDs were dispersed in water and ultrasonicated for 4 h. Then, the second harmonic produced by a Q-switched Nd:YAG laser device with a wavelength of 532 nm, pulse width of 10 ns, repeating frequency of 10 Hz, and laser pulse power of 150 mJ is focused into the middle of the bottle with 1 mm beam size for 3h. The carbon quantum dots (CQDs) were collected by centrifuge to exclude large particles at room temperature prior to further applications.

# Fluorescence lifetimes

The carbon quantum dots (CQDs; 1 µM) were coated onto a sterile slide by adding a solution of them dropwise. The slide was analyzed using a microchannel plate-photomultiplier tube (SPC-150, HAM-R3809U-50, Hamamatsu, Japan). The fluorescence lifetime was measured at an excitation wavelength of 400 nm and the emission signals were observed at 560 nm.

# Atomic force microscopy

The dimensions and structural properties of the CQDs were measured with atomic force microscopy (CoreAFM, Nanosurf, Switzerland). Freshly prepared CQDs were diluted with Milli-Q water to a concentration of 1 mg/ml. A uniform dispersion of CQDs was achieved using ultrasonication. The suspension of dispersed CQDs (10 µL) was added to a mica surface and dried at room temperature.

# Ultraviolet–visible-light absorption spectra

The raw CQDs were diluted with 2× phosphate-buffered saline (PBS) to 10 µM/mL. The nanoparticles were uniformly dispersed in the solution using an ultrasonic water bath. Then, 100 µL of the raw CQDs and a suspension diluted with PBS were added to 96-well plates. The absorption spectra of the samples were detected using a microplate reader (Synergy H1, Bio Tek, VT, USA). The excitation wavelengths were from 300 to 700 nm, the fixed launch was 450 nm, the temperature was 37℃, and the detection height was 7 nm.

# Infrared microscopy

The raw CQDs were diluted with 2× PBS to 10 µM/mL, and the samples were uniformly dispersed in the solution using an ultrasonic water bath. The functional groups of the CQDs in the suspension were analyzed using a Fourier-transform infrared spectrometer (Equinox 55, Bruker, MA, USA) coupled with an infrared microscope.

# Absorption assay and subcellular distribution

Human prostate cancer PC-3M and A549 cells were incubated with CQDs (10 mM) for 12 h. The incubated culture media were fixed with 4% paraformaldehyde and 0.5% glutaraldehyde for 15 min., respectively, and centrifuged at 3000*g* for 15 min. at room temperature. The samples were imaged with a transmission electron microscope (TEM; 100CX, JEOL, Inc., Japan) operating at 80 kV.

### Relative expression of genes in the liver

RNA isolation and real-time polymerase chain reactions (RT-PCR) were carried out by extracting the total RNA from the livers using TRIzol reagents (Invitrogen, MA, USA). The RNA concentration was detected by a Nanodrop 2000 (ThermoFisher, MA, USA). RNA was reversed to complementary DNA (cDNA) with a PrimeScript RT reagent kit (TaKaRa, Japan). Relative quantification to detect mRNA expression was identified by CFX96 touch (Bio-Rad, USA) with a SYBR Premix Ex Taq kit (Takara, Japan). The primer sequences were as follows in table 1.

Table S1. The primer sequences of PI3K, P38, SHF1, ERK, JNK, P53 and NF-κB1.

| Gene | Forward primer | Reverse primer | |
| --- | --- | --- | --- |
| PI3K | 5'-TTCCCTCGCAATAGGTTCTCC-3' | | 5'- GACCAATACTTGATGTGGCTGAC-3' | |
| P38 | 5'-CCCCAGAGATCATGCTGAAT-3' | | 5'- ACAACGTTCTTCCGGTCAAC -3' | |
| SHF1 | 5'-ATGGAGTCAATGAAGGCAGTT-3' | | 5'- CTCTGGTCCGTGTCAAGCAAG -3' | |
| ERK | 5'-GAGCCTGTTCAACTTCAATCCT-3' | | 5'-GTTCCCAAATGCTGACTCCAA-3' | |
| JNK | 5'-TCCTCCAAATCCATTACCTCC-3' | | 5'-CTCCAGCACCCATACATCAAC-3' | |
| P53 | 5'-TTACCAGGGCAACTATGGCTTCC-3' | | 5'-TTACCAGGGCAACTATGGCTTCC-3' | |
| NF-κB1 | 5'-GGGAAAAGTCCCCAAATCCTT-3' | | 5'-GCATCCAACCTGAAAATCGTG-3' | |

All clones were verified by DNA sequencing (Elim Biopharmaceuticals, Hayward, CA, USA). Data are presented as fold change in gene expression.

### Zeta potentials

Zeta potentials were determined by dynamic light-scattering instrument (DLS) (Zetasizer Nano-ZS, Malvern Instruments, UK). FNDs were dispersed uniformly in deionized water at a concentration of 500 µm/ml. A volume of 0.8 ml of each sample was added to the capillary sample pool and all measurements were run in triplicate.

# Figures


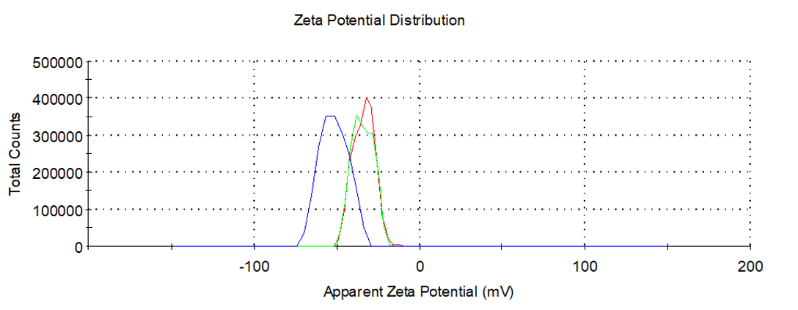


**Figure S1:** Raw data of zeta potential distribution on CQDs.


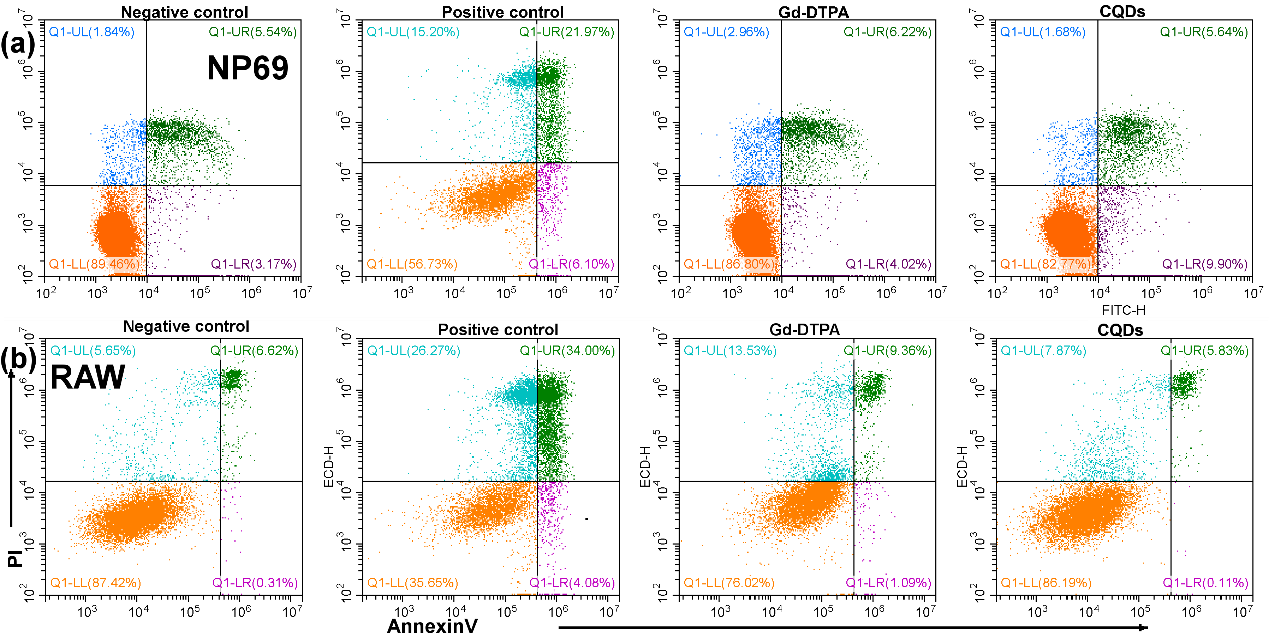


**Figure S2:** Comparison of flow cytometry scatterplots of apoptosis influenced by CQDs in different cell lines: (a) NP69 and (b) RAW264.7.


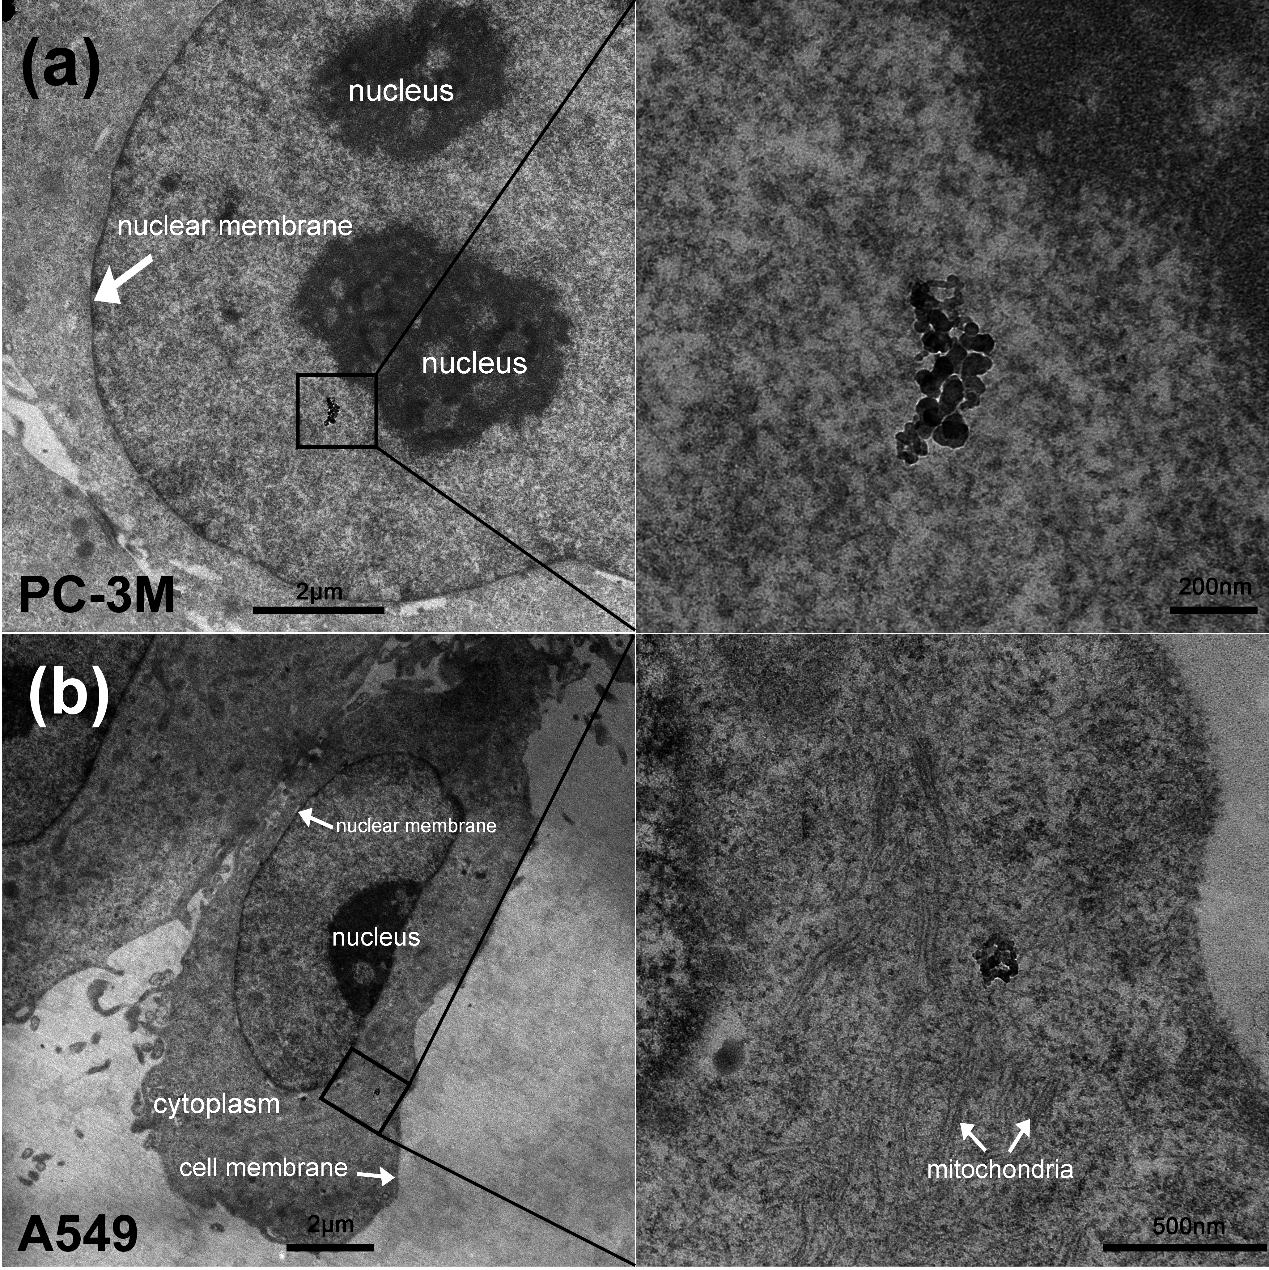


**Figure S3:** TEM images showing cellular uptake of CQDs by (a) PC-3M and (b) A549 cells at 12 h after incubation with CQDs.


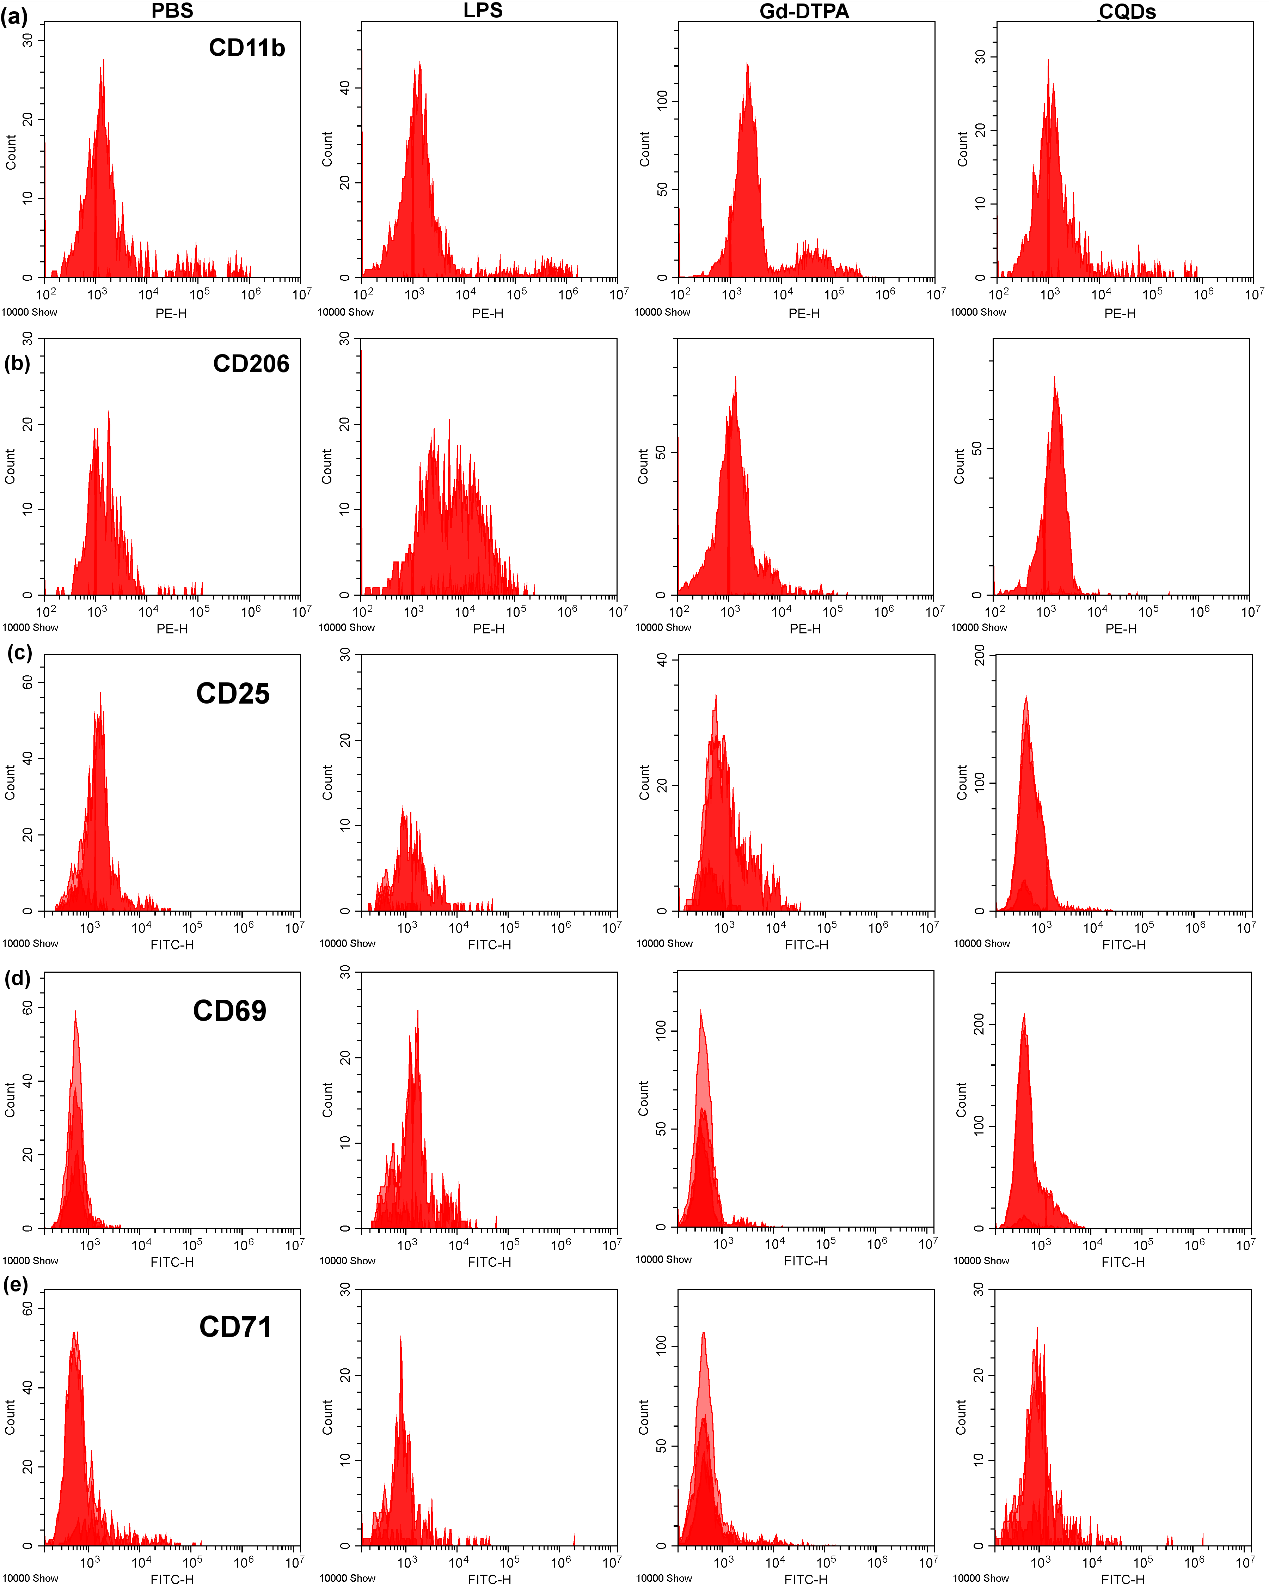


**Figure S4:** Flow cytometry measuring production of intracellular ROS in peripheral blood after CQDs were injected into BALB/c mice: (a) APC-F4/80 and PE-CD11b, (b) APC-F4/80 and PE-CD206, (c) PE-CD3 and FITC-CD25, (d) PE-CD3 and FITC-CD69, and (e) PE-CD3 and FITC-CD71.

(b)

(b)

(c)


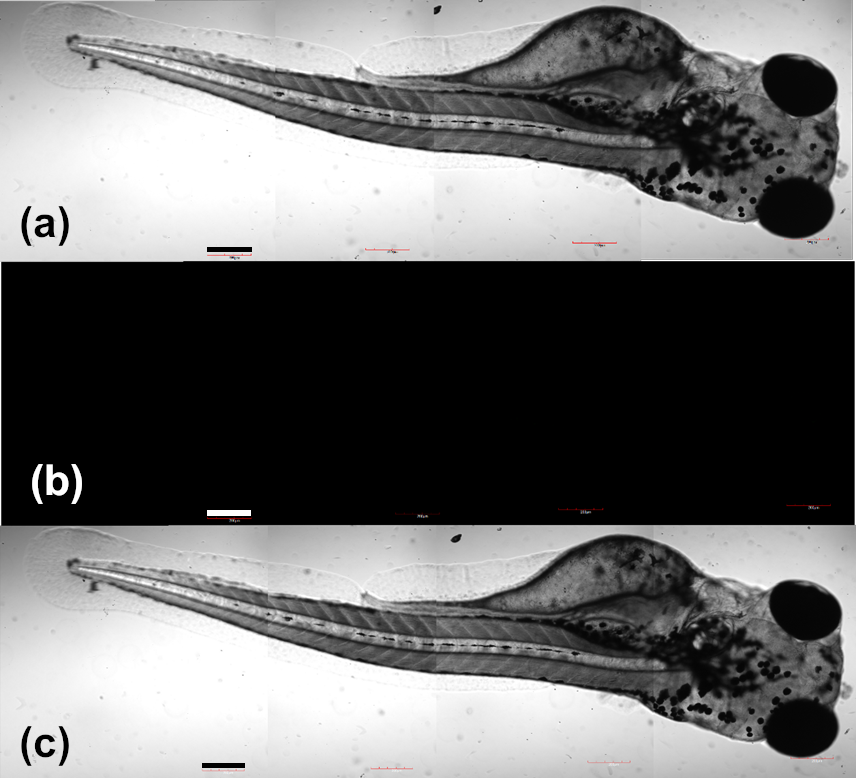


**Figure S5:** (a) Bright-field image, (b) fluorescence image, and (c) merged image of a zebrafish incubated without CQDs at λmax = 488 nm excitation. (scale bar=200µm)
